# Supplementary material for: Dying Cells Protect Survivors from Radiation-Induced Cell Death in Drosophila
Source: PubMed Central journal article supplement (PMC3967929; doi:10.1371/journal.pgen.1004220), 2014-03-27

**A**

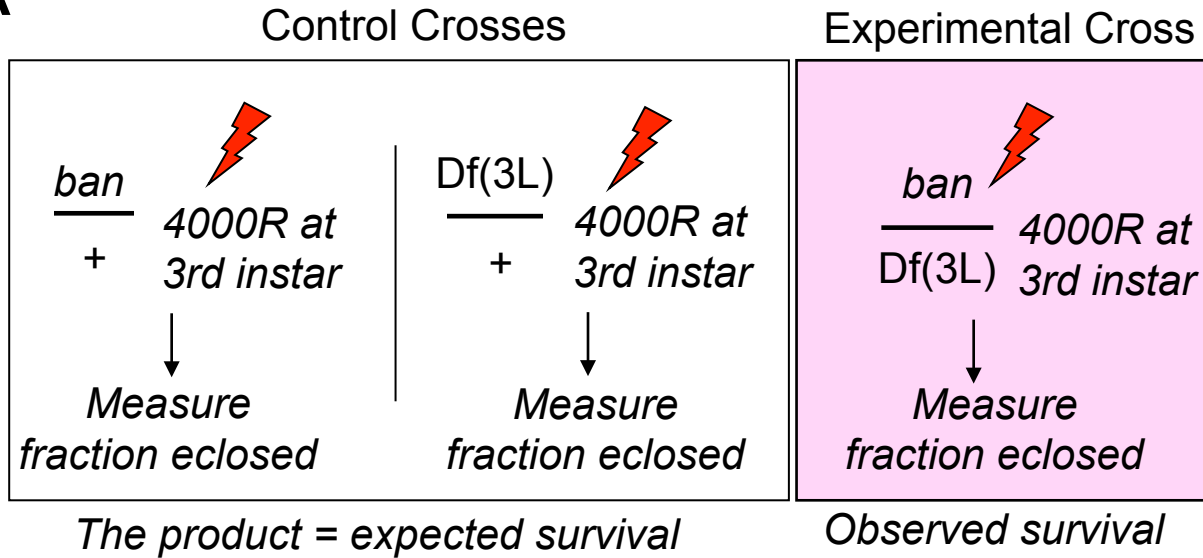

**B**

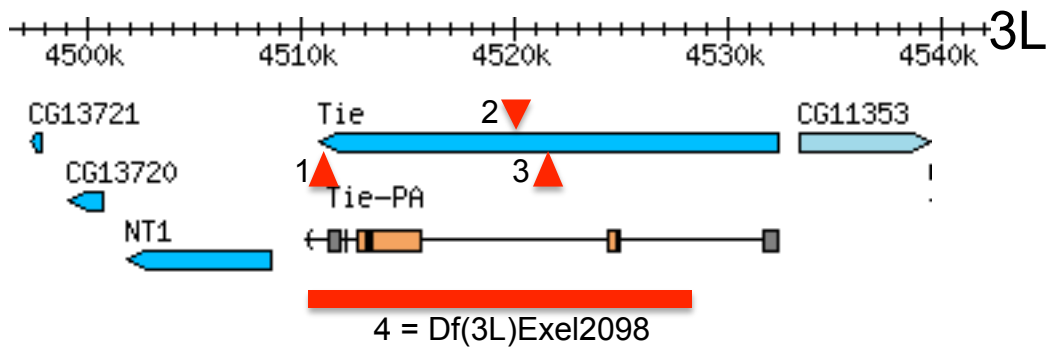

- 1 = PBAC{3HPy<sup>+</sup>}Tie<sup>e098</sup>, inserted in predicted 3'UTR
- 2 = PBAC{RB}Tie<sup>e03394</sup>, inserted in the second intron
- 3 = PBAC{RB}Tie<sup>e02680</sup>, inserted in the second intron
- 4 = Df(3L)Exel298, predicted to remove the entire *tie* coding region and no other gene

**C**

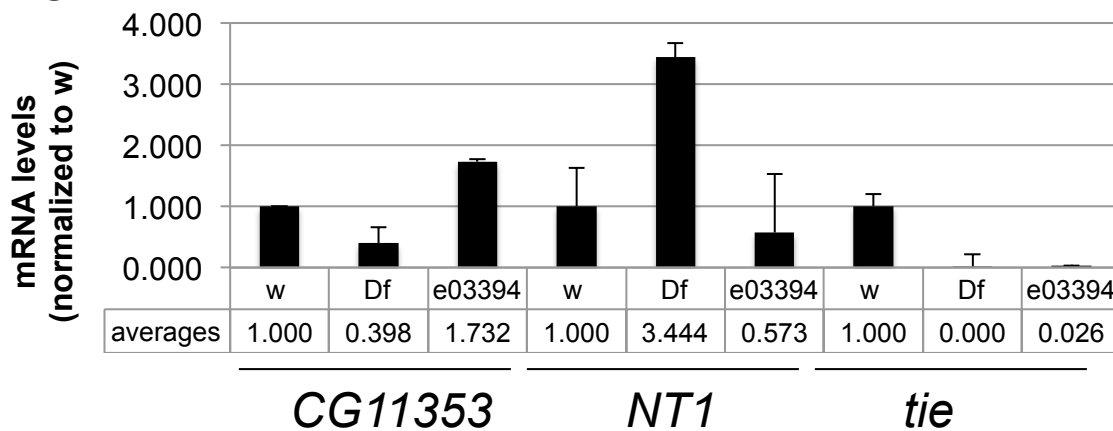

Supplement: pgen.1004220.s005.pdf [file pgen.1004220.s005.pdf]
