# Supplementary material for: Dying Cells Protect Survivors from Radiation-Induced Cell Death in Drosophila
Source: PubMed Central journal article supplement (PMC3967929; doi:10.1371/journal.pgen.1004220), 2014-03-27

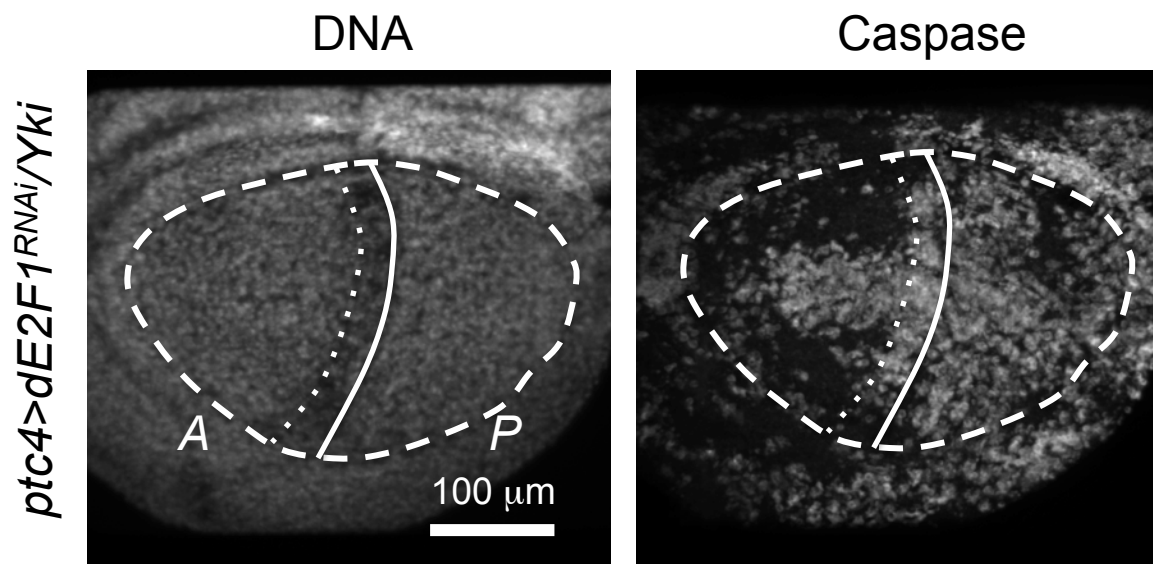

Supplement: pgen.1004220.s009.pdf [file pgen.1004220.s009.pdf]
