# Supplementary material for: Dying Cells Protect Survivors from Radiation-Induced Cell Death in Drosophila
Source: PubMed Central journal article supplement (PMC3967929; doi:10.1371/journal.pgen.1004220), 2014-03-27
Supplement: pgen.1004220.s011.pdf [file pgen.1004220.s011.pdf]

Bilak et al. Table S1

Table S1. Changes in the mRNA levels at 2 hours after IR

| <b>gene</b>    | <b><math>yw^{1118}</math></b> | <b>p value</b> | <b><math>p53^{5A-1-4}</math></b> | <b>p value</b> |
|----------------|-------------------------------|----------------|----------------------------------|----------------|
| <i>pvf1</i>    | 1.635                         | 0.000013       | -0.282                           | 0.539042       |
| <i>pvf2</i>    | 1.882                         | 2.30E-13       | 0.137                            | 0.377999       |
| <i>CG10359</i> | 1.452                         | 0.000087       | 1.193                            | 0.042465       |
| <i>tie</i>     | 1.280                         | 0.692          | ND                               | ND             |
| <i>pvf3</i>    | 0.875                         | 0.947          | ND                               | ND             |
